# Supplementary material
Source: PubMed Central journal article supplement (PMC6329294)

Supplemental Figure 1.

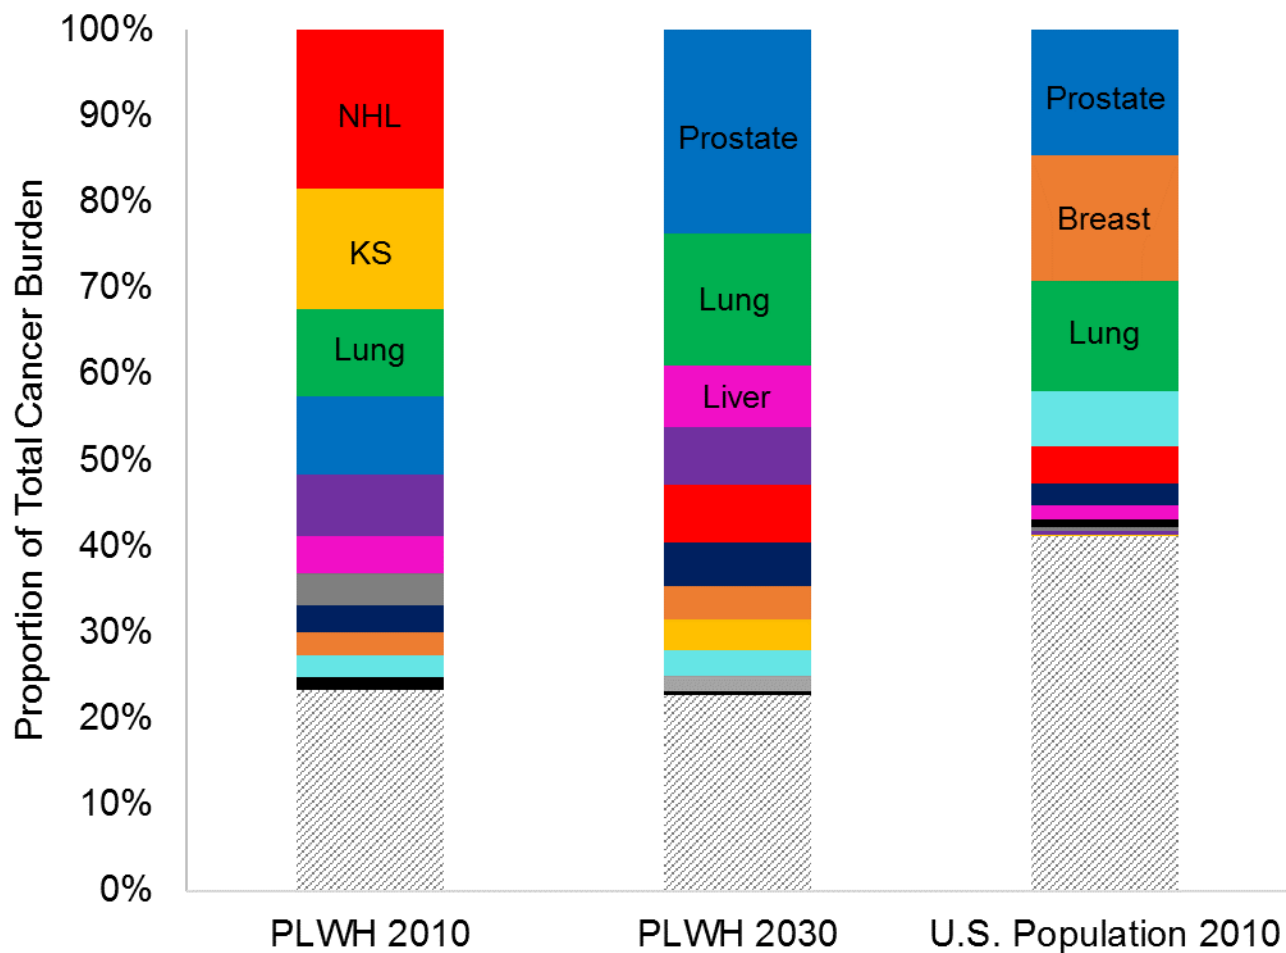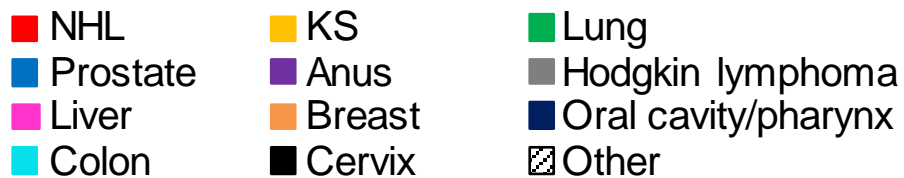

Supplement: NIHMS998363-supplement-1.pdf [file NIHMS998363-supplement-1.pdf]
